# Supplementary material for: Immunoproteasome Overexpression Underlies the Pathogenesis of Thyroid Oncocytes and Primary Hypothyroidism: Studies in Humans and Mice
Source: PLoS One. 2009 Nov 17;4(11):e7857. doi: 10.1371/journal.pone.0007857 (PMC2773418; doi:10.1371/journal.pone.0007857)
Supplement: Table S1 — Top 10 genes expressed in thyr-IFNγ transgenic mouse thyrocytes (total tag # is 43,718). (0.06 MB DOC) [file pone.0007857.s005.doc]

Table S1: Top 10 genes expressed in *thyr*-IFN transgenic mouse thyrocytes (total tag # is 43,718).

| Rank | Gene Description | Uni Gene # | # of tags /10,000  (rounded) |
| --- | --- | --- | --- |
| 1 | H2-K1 MHC class I heavy chain precursor (H-2K(d)) | Mm.16771 | 302 |
| MHC class I (B7.2) cell surface antigen mRNA, 3' end | Mm.380380 |
| 2 | Tgn Thyroglobulin (Tgn), mRNA | Mm.12800 | 203 |
| 3 | Hba-a1 Hemoglobin alpha, adult chain 1 (Hba-a1), mRNA | Mm.196110 | 94 |
| H3f3a H3 histone, family 3A, mRNA | Mm.315189 |
| 4 | Elavl1 ELAV (embryonic lethal, abnormal vision, Drosophila)-like 1 (Hu antigen R), mRNA | Mm.119162 | 93 |
| Exosc2 Exosome component 2 (Exosc2), mRNA | Mm.150972 |
| 1300015B04Rik RIKEN cDNA 1300015B04 gene, mRNA | Mm.169261 |
| Itch Ubiquitin protein ligase (Itch) | Mm.208286 |
| Cyp2e1 Cytochrome P450, family 2, subfamily e, polypeptide 1, mRNA | Mm.21758 |
| 5530601H04Rik PREDICTED: hypothetical protein LOC71445, mRNA sequence | Mm.242968 |
| Acmsd Amino carboxymuconate semialdehyde decarboxylase (Acmsd), mRNA | Mm.25735 |
| PREDICTED: similar to ZNF43 protein, mRNA sequence | Mm.260056 |
| Wap Whey acidic protein, mRNA | Mm.268094 |
| Stat5a Signal transducer and activator of transcription 5B (Stat5b) | Mm.277403 |
| D19Ertd737e DNA segment, Chr 19, ERATO Doi 737, expressed, mRNA | Mm.290183 |
| Cklfsf7 Chemokine-like factor super family 7, mRNA | Mm.35600 |
| Leprel2 Leprecan-like 2, mRNA | Mm.35708 |
| Fbxo24 PREDICTED: F-box only protein 24, mRNA sequence | Mm.379192 |
| Irak1 IRAK1-S mRNA for interleukin-1 receptor-associated kinase-1-S | Mm.38241 |
| Thap1 THAP domain containing, apoptosis associated protein 1, mRNA | Mm.383241 |
| Gpr21 G protein-coupled receptor 21 (Gpr21), mRNA | Mm.386910 |
| Ifnar1 Interferon (alpha and beta) receptor 1 (Ifnar1), mRNA | Mm.502 |
| 5 | Evi2a Ecotropic viral integration site 2a, mRNA | Mm.164948 | 85 |
| Ii Ia-associated invariant chain, mRNA | Mm.276499 |
| Sh2d4a PREDICTED: SH2 domain containing 4A, mRNA sequence | Mm.40974 |
| 6 | Hbb-b1 Hemoglobin, beta adult major chain, mRNA | Mm.288567 | 83 |
| Hbb PREDICTED: similar to Hemoglobin beta-1 chain (B1) (Hemoglobin beta-major chain), mRNA sequence | Mm.387214 |
| 7 | Transcribed locus, weakly similar to NP_904337.1 NADH dehydrogenase subunit 4 | Mm.261851 | 73 |
| Suclg1 Succinate-CoA ligase, GDP-forming, alpha subunit, mRNA | Mm.29845 |
| 8 | H2-Aa Histocompatibility 2, class II antigen A, alpha, mRNA | Mm.235338 | 35 |
| 9 | B2m Beta-2 microglobulin (B2m), mRNA | Mm.163 | 33 |
| 10 | H2-Ab1 Histocompatibility 2, class II antigen A, beta 1, mRNA | Mm.254067 | 30 |
